# Supplementary material for: Interface-engineered N-doped carbon dot/CdSe nanoconjugates as efficient Bi-functional electrocatalysts in alkaline media
Source: Royal Society of Chemistry journal article supplement (doi:10.1039/d6ra00371k), 2026-04-07
Supplement: d6ra00371k1.pdf [file d6ra00371k1.pdf]

## Supporting Information

# Interface-Engineered N-doped Carbon Dot/CdSe Nanoconjugates as Efficient Bi-functional Electrocatalyst in Alkaline Media

Rituparna Dutta<sup>a</sup>, Gokul Sivaguru<sup>a</sup>, Uday Kumar Ghorui<sup>a,b</sup>, Aswathi Mangalasseri<sup>a</sup>, Sabyasachi Chakraborty<sup>a,c,\*</sup>

<sup>a</sup> Department of Chemistry, School of Engineering and Sciences (SEAS), SRM University - AP, Amaravati, Andhra Pradesh 522240, India.

<sup>b</sup> Department of Chemistry, Indian Institute of Technology Gandhinagar, Palaj, Gujarat 382355, India

<sup>c</sup> Centre for Interdisciplinary Research, SRM University - AP, Amaravati, Andhra Pradesh 522240, India.

### **\*Corresponding Author:**

Dr. Sabyasachi Chakraborty; Email ID: [sabyasachi.c@srmmap.edu.in](mailto:sabyasachi.c@srmmap.edu.in)

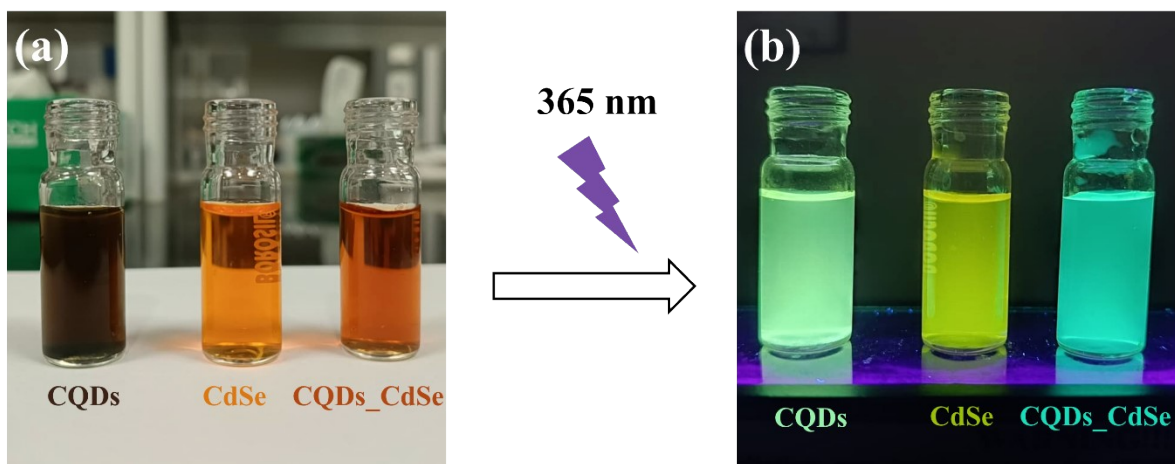

**Figure S1:** Digital images (A) under normal light & (B) under 365 nm UV lamp of (a) CQDs, (b) CdSe QDs, (c) CQDs\_CdSe

**Table S1:** Calculation for average lifetime

| S No | Material  | $\tau_1$<br>(ns) | $\alpha_1$ | $\tau_2$<br>(ns) | $\alpha_2$ | $\tau_3$<br>(ns) | $\alpha_3$ | $\langle \tau \rangle$ (ns) |
|------|-----------|------------------|------------|------------------|------------|------------------|------------|-----------------------------|
| 1    | CQDs      | 0.35             | 2.86       | 3.85             | 50.23      | 10.10            | 46.90      | 6.70                        |
| 2    | CdSe      | 3.18             | 32.92      | 0.23             | 13.23      | 20.30            | 53.85      | 12                          |
| 3    | CQDs_CdSe | 3.59             | 32.36      | 10.90            | 62.26      | 0.29             | 5.38       | 7.9                         |

**Table S2:** Measurement of zeta potential

| Sample name | Measurement 1 | Measurement 2 | Measurement 3 | Average ZP    |
|-------------|---------------|---------------|---------------|---------------|
| CQDs        | -17.1         | -16.8         | -18.4         | -17.43 ± 0.49 |
| CdSe        | -19.7         | -26.8         | -27.7         | -24.73 ± 2.53 |
| CQDs_CdSe   | -30.9         | -32.1         | -31.7         | -31.56 ± 0.35 |

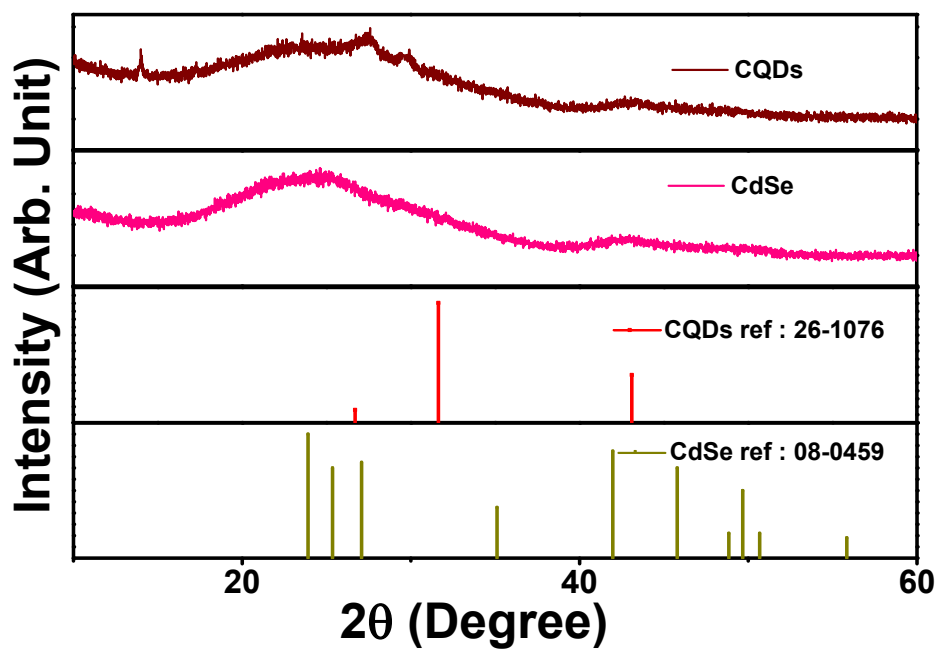

**Figure S2:** PXRD patterns of synthesized CQDs, CdSe QDs

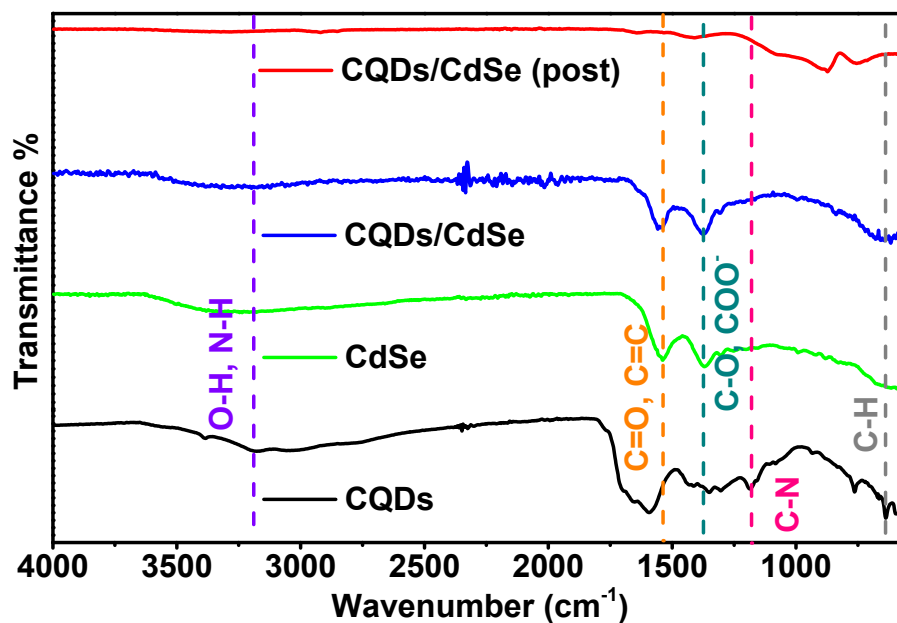

**Figure S3:** FTIR spectra of synthesized CQDs, CdSe QDs, CQDs/CdSe (before and after electrolysis)

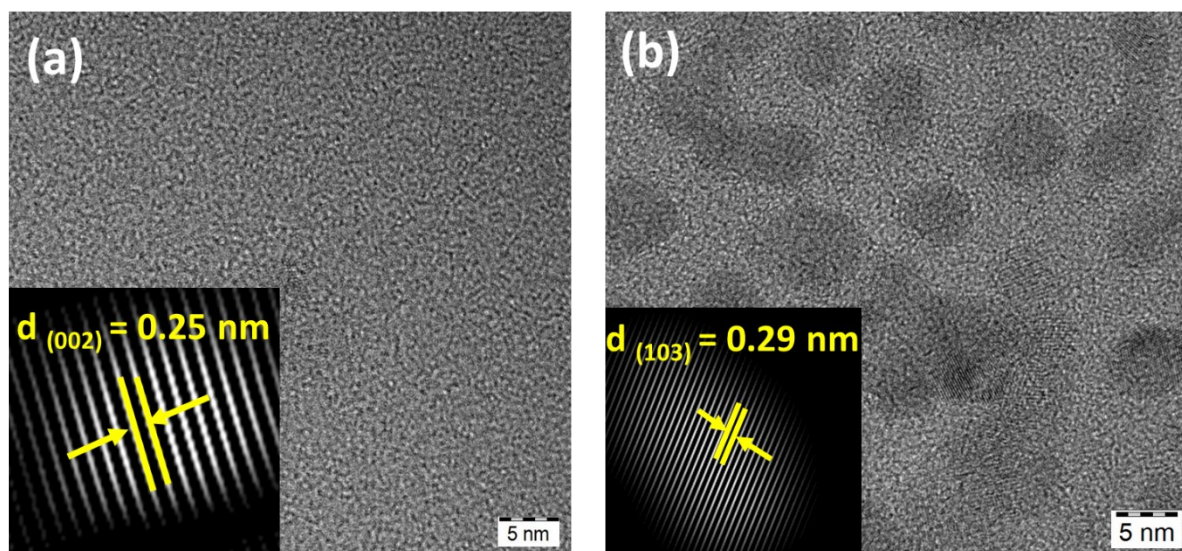

**Figure S4:** HRTEM image of (a) CQDs quantum dot, and (b) CdSe quantum dots with the respective inverse Fast Fourier Transform images and lattice spacing values in the inset.

**Table S3:** Elemental composition of CQDs/CdSe

| Elements | Atomic % |
|----------|----------|
| Cd 3d    | 3.9      |
| Se 3d    | 3.6      |
| C 1s     | 92.5     |

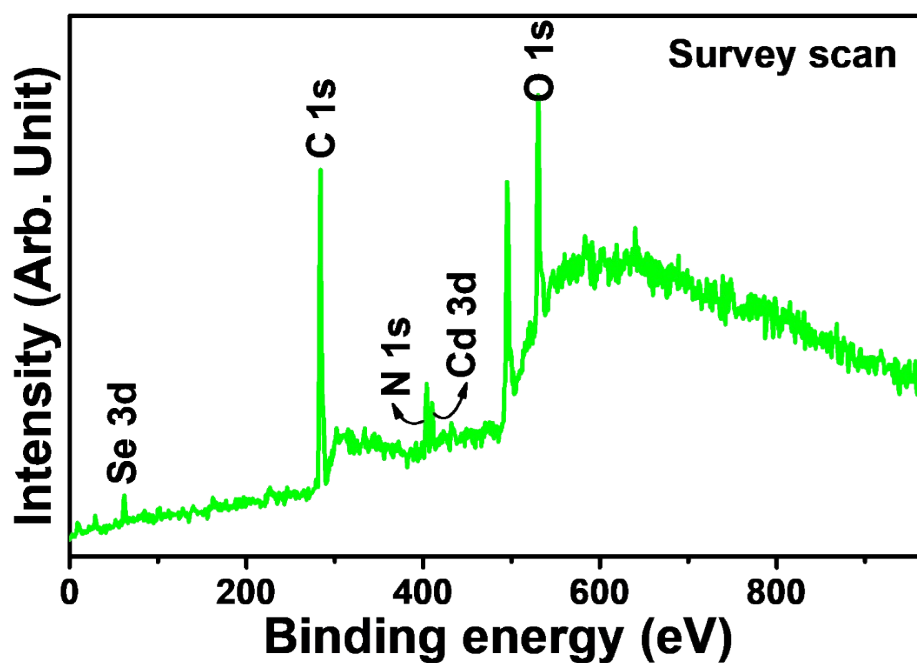

**Figure S5:** XPS Survey spectra of synthesized CQDs/CdSe QDs

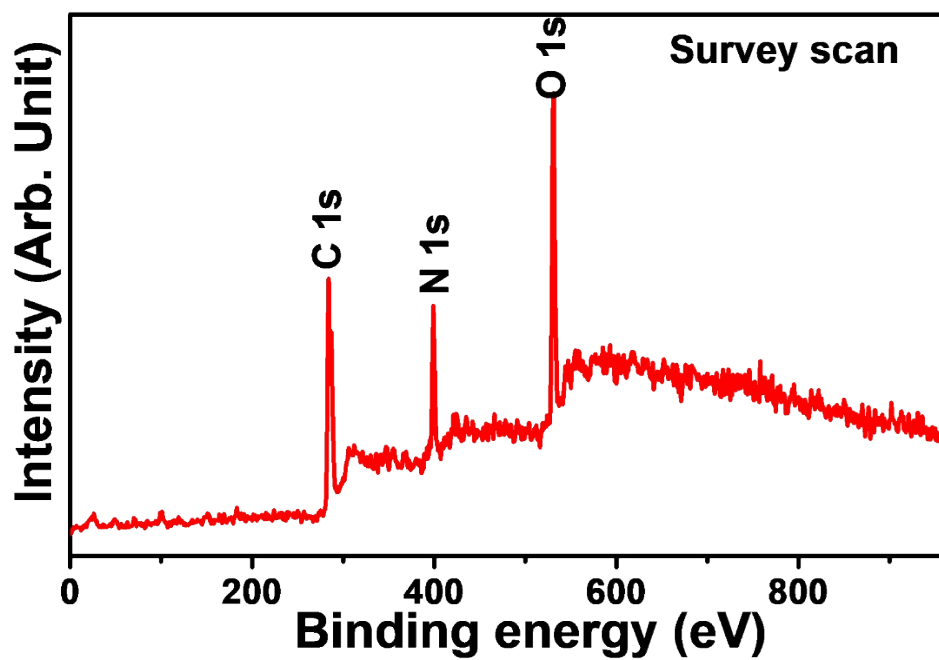

Figure S6: XPS Survey spectra of synthesized CQDs

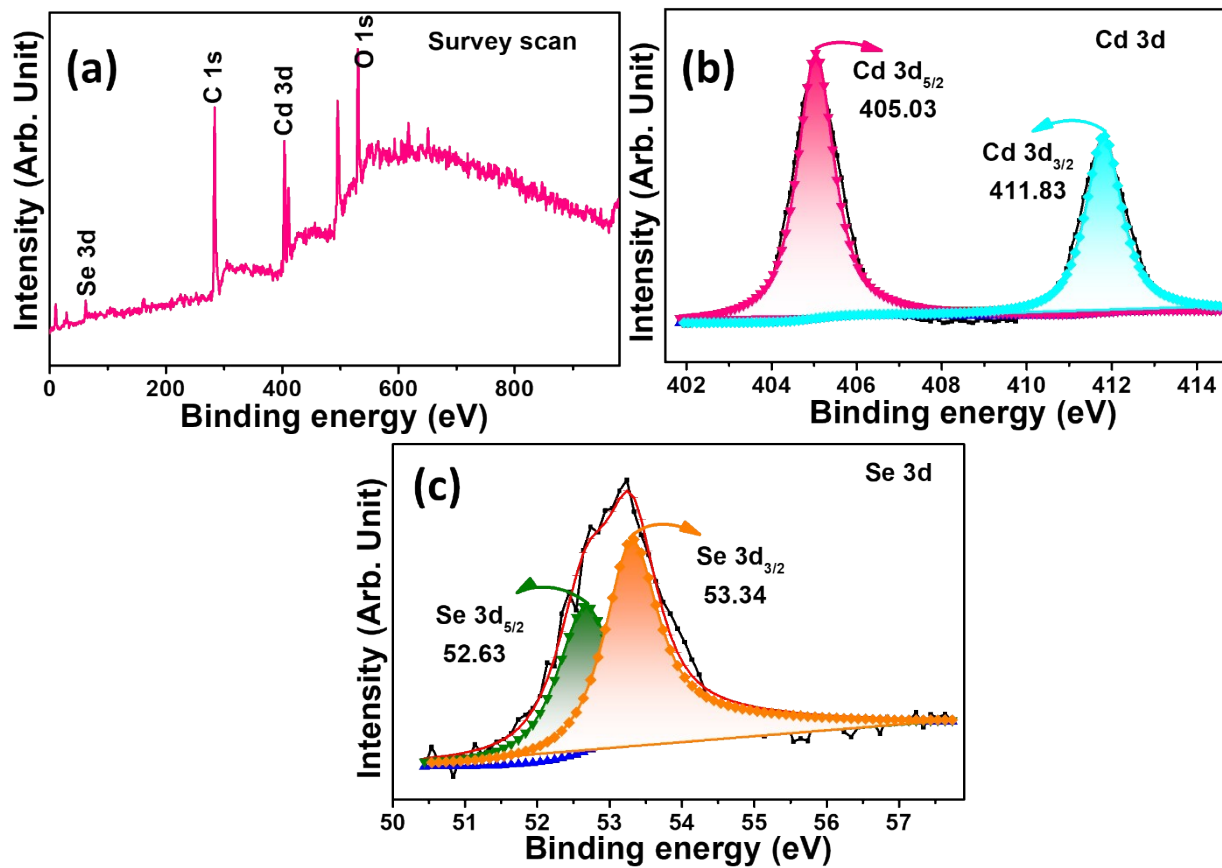

**Figure S7:** (a) XPS Survey spectra, (b) Cd 3d, (c) Se 3d of synthesized CdSe

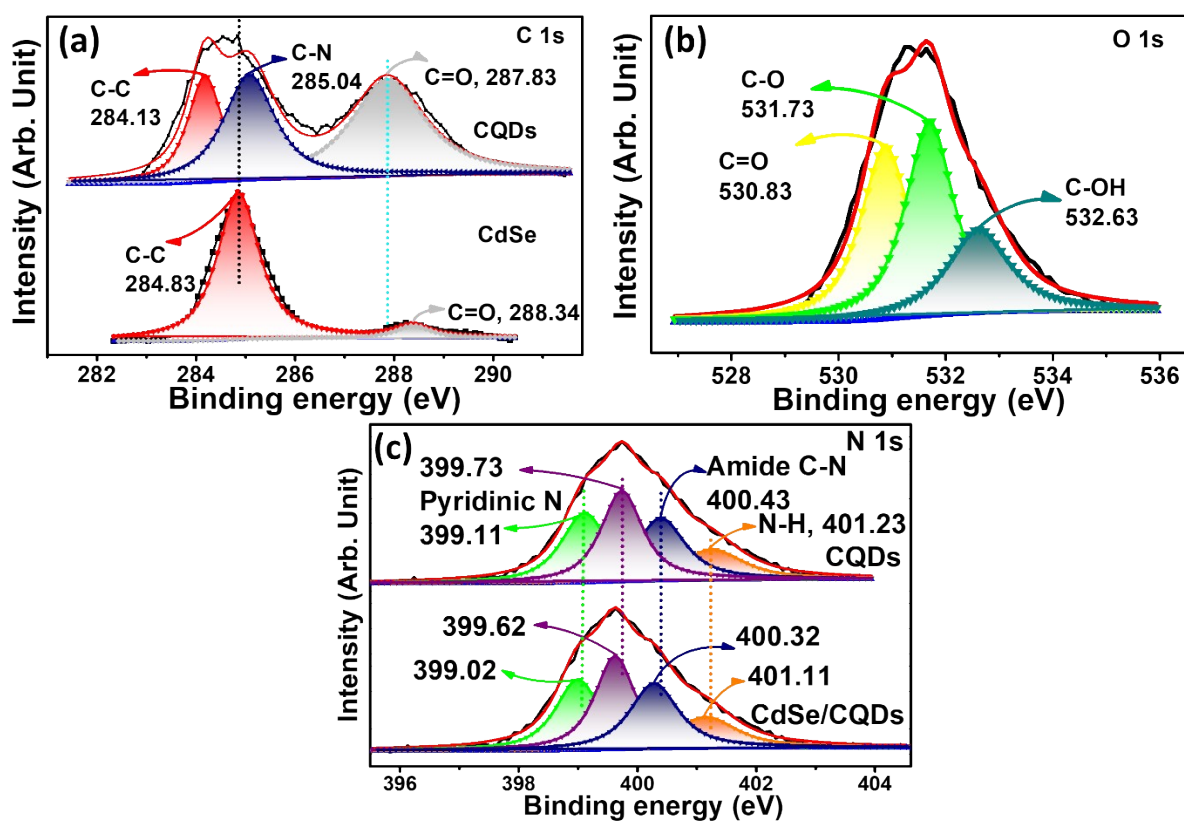

**Figure S8:** (a) C 1s spectra of synthesized CQDs and CdSe, (b) O 1s spectra of synthesized CQDs, (c) deconvoluted N 1s spectra of CQDs and CQDs/CdSe

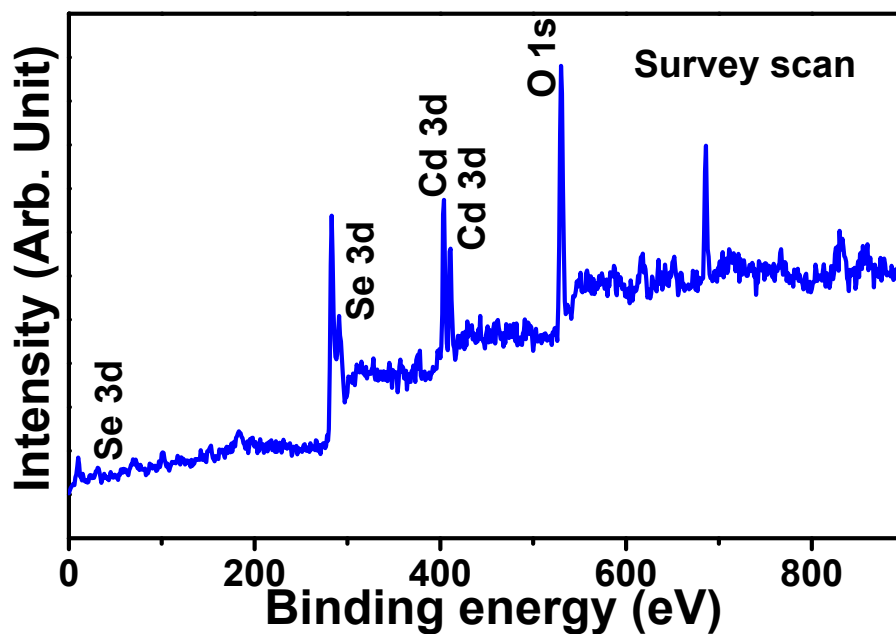

Figure S9: XPS Survey spectra of synthesized CQDs/CdSe (after electrolysis)

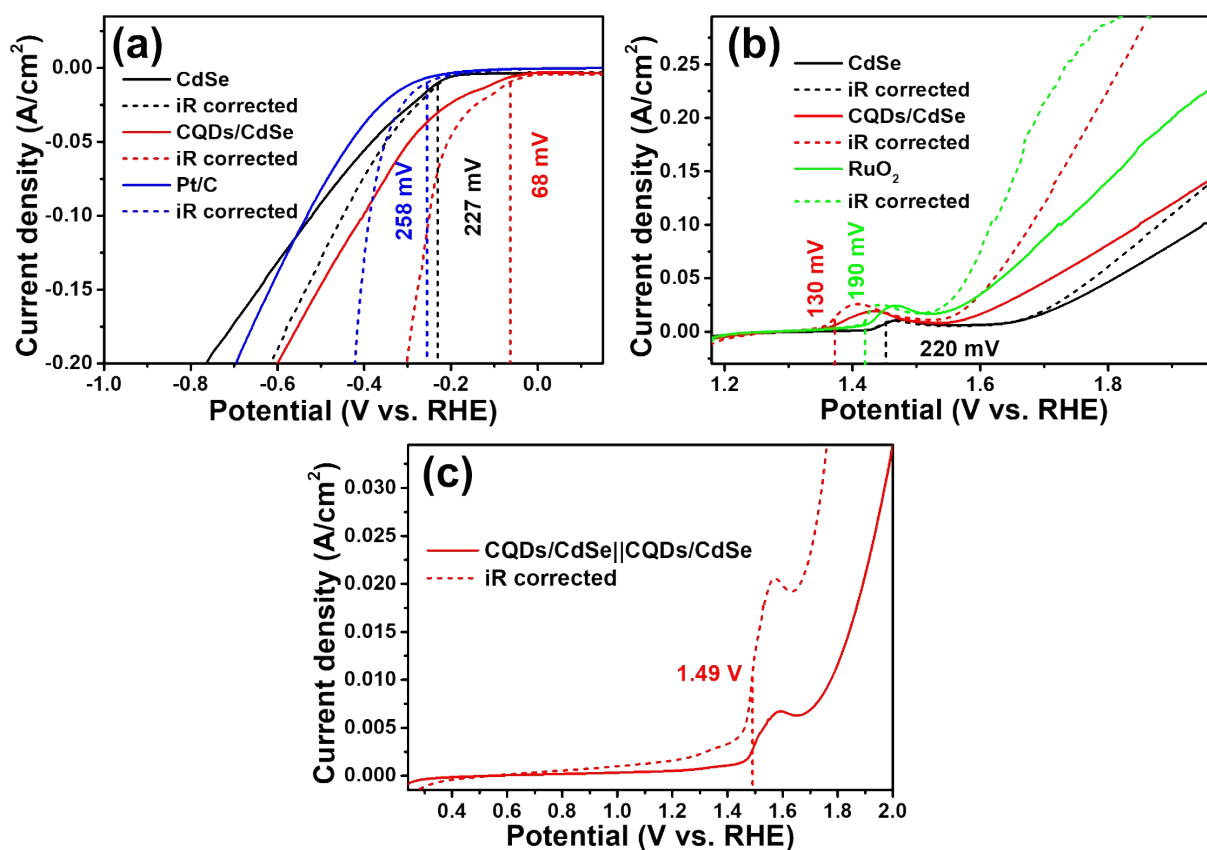

Figure S10: iR corrected linear sweep voltametric curve of CQDs/CdSe, CdSe, Pt/C, RuO<sub>2</sub> for (a) HER, (b) OER and CQDs/CdSe for (c) OWS at a scan rate of 10 mA/cm<sup>2</sup>

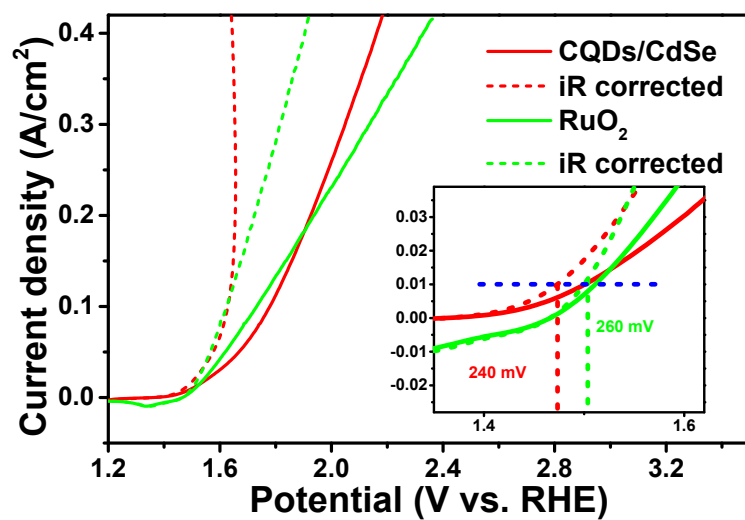

**Figure S11:** Negative Linear sweep voltametric curve for CQDs/CdSe and benchmark catalyst RuO<sub>2</sub> (inset: overpotential at 10 mA/cm<sup>2</sup>) performed at 10 mV/s in 1 M KOH.

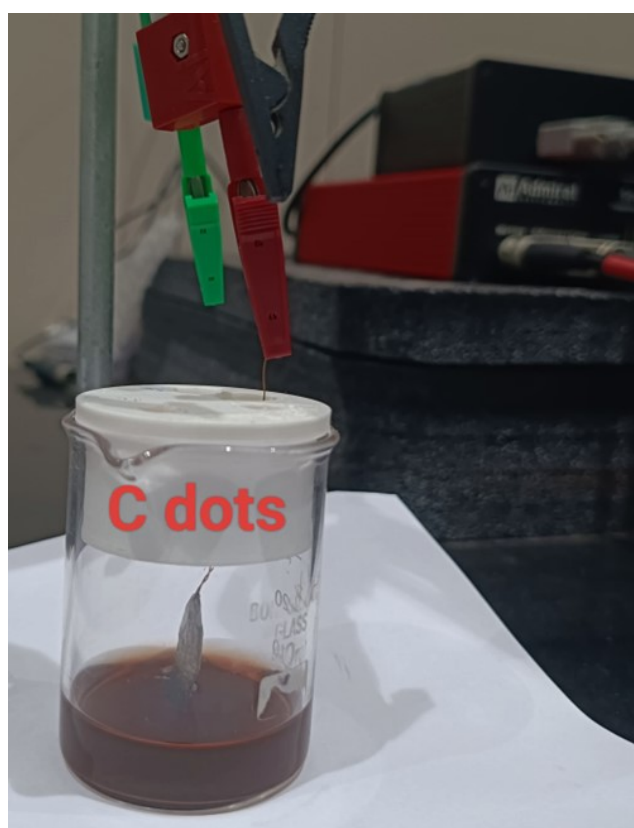

**Figure S12:** Digital image of performed EC of CQDs

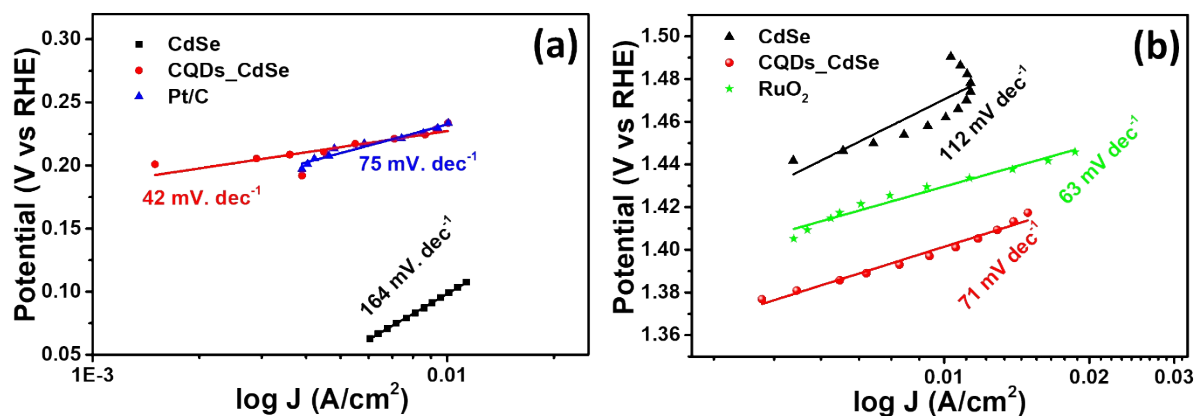

**Figure S13:** Tafel Slope of (a) HER, and (b) OER where the nanocomposite exhibited a lower tafel slope which indicates the quicker kinetics.

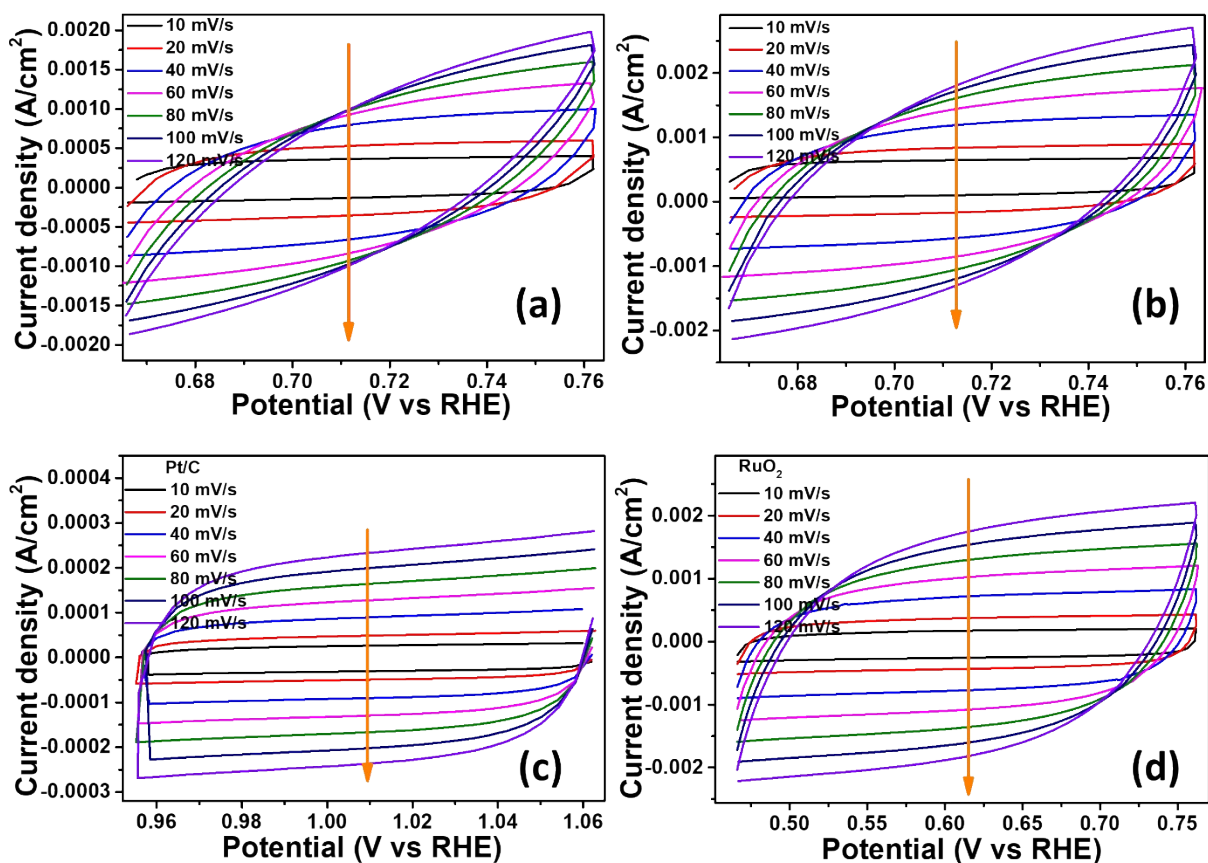

**Figure S14:** CV cycles in non-faradaic region at different scan rate of (a) CdSe, (b) CQDs/CdSe, (c) Pt/C, (d) RuO<sub>2</sub>

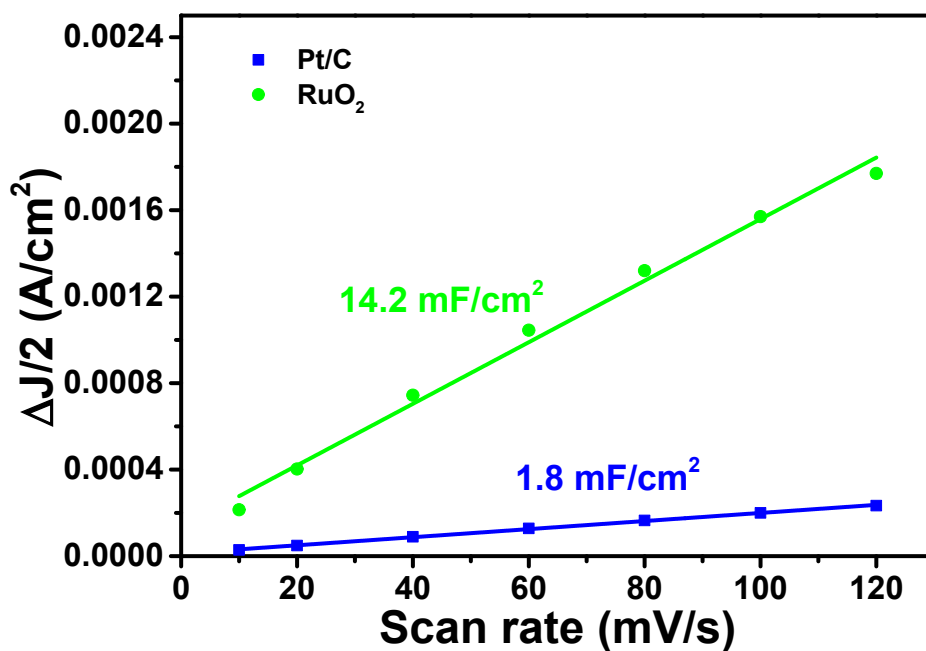

**Figure S15:** Double layer capacitance ( $C_{dl}$ ) of Pt/C and RuO<sub>s</sub> for the evaluation of electrochemically active surface area (ECSA)

**Table S4:** Comparison table of the ECSA value of synthesized nanocomposite with the benchmark catalysts

| Material         | $C_{dl}$<br>(mF/cm <sup>2</sup> ) | ECSA<br>(cm <sup>2</sup> ) |
|------------------|-----------------------------------|----------------------------|
| Pt/C             | 1.8                               | 45                         |
| CdSe             | 6.1                               | 152.5                      |
| RuO <sub>2</sub> | 14.2                              | 355                        |
| CQDs/CdSe        | 11.1                              | 277.5                      |

**Table S5:** Comparison table of the synthesized nanocomposite with the reported literatures

| Materials | Overpotential<br>(mV) |     | Tafel slope<br>(mV/dec) |     | Stability | Reference |
|-----------|-----------------------|-----|-------------------------|-----|-----------|-----------|
|           | HER                   | OER | HER                     | OER |           |           |
|           |                       |     |                         |     |           |           |

|                                                        |           |            |           |           |                               |                  |
|--------------------------------------------------------|-----------|------------|-----------|-----------|-------------------------------|------------------|
| Co/GQDs                                                | -         | 330        | -         | -         | 60 s                          | 1                |
| NiSe <sub>2</sub> @NC                                  | 220       | -          | 70.6      | -         | 12 h at 20 mA/cm <sup>2</sup> | 2                |
| CMS - 12 h                                             | 190       | -          | 143       | -         | 12 h at 20 mA/cm <sup>2</sup> | 3                |
| CoSe <sub>2</sub> @CdSe & CdSe @ CoSe <sub>2</sub>     | 147 & 110 | 329 & 140  | -         | -         | -                             | 4                |
| CuO @ CQDs                                             | 155       | 322        | -         | -         | 12 h                          | 5                |
| CoNi <sub>2</sub> S <sub>4</sub> @CoS <sub>2</sub> /NF | 173       | 259        | -         | -         | -                             | 6                |
| <b>CQDs/CdSe</b>                                       | <b>99</b> | <b>170</b> | <b>42</b> | <b>71</b> | <b>50 h</b>                   | <b>This work</b> |

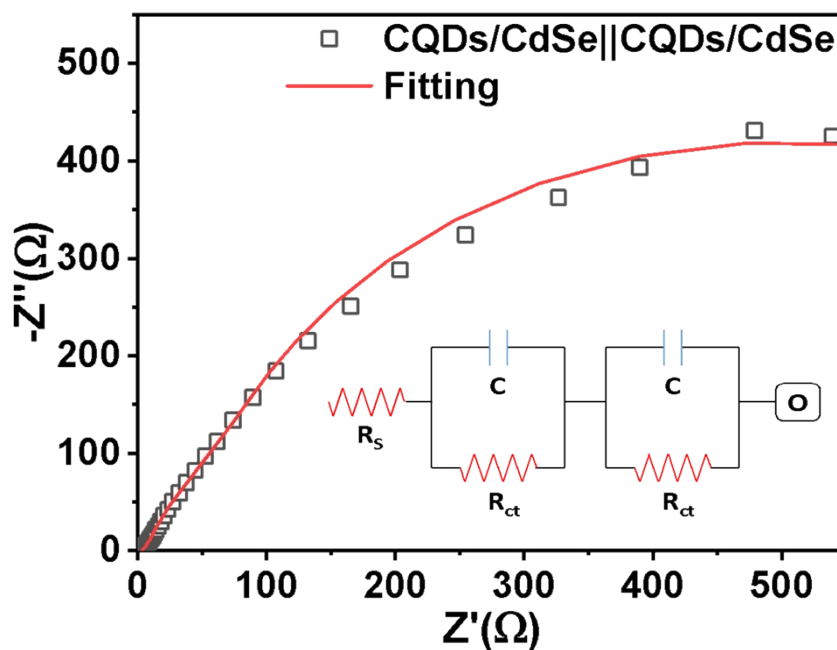

**Figure S16:** EIS spectra of overall water splitting performed with CQDs\_CdSe as anode and cathode in 1 M KOH

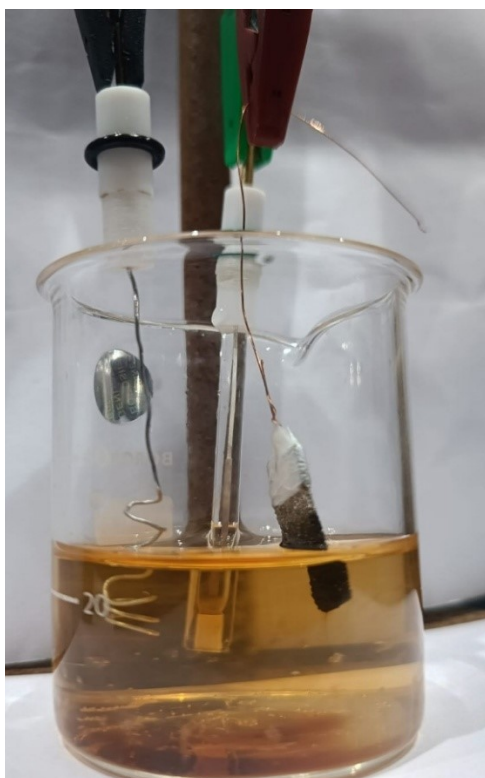

**Figure S17:** Digital image of performed EC on CQDs and CdSe physical mixture as electrode and a visible leaching of material was observed.

## Reference

- 1 J. Cirone, S. R. Ahmed, P. C. Wood and A. Chen, Green Synthesis and Electrochemical Study of Cobalt/Graphene Quantum Dots for Efficient Water Splitting, *Journal of Physical Chemistry C*, 2019, **123**, 9183–9191.
- 2 H. H. Do, Q. Van Le, T. H. Lee, S. H. Hong, S. H. Ahn, H. W. Jang and S. Y. Kim, Core-shell architecture of NiSe<sub>2</sub> nanoparticles@nitrogen-doped carbon for hydrogen evolution reaction in acidic and alkaline media, *Int J Energy Res*, 2021, **45**, 20463–20473.
- 3 S. Shit, W. Jang, S. Bolar, N. C. Murmu, H. Koo and T. Kuila, Effect of Ion Diffusion in Cobalt Molybdenum Bimetallic Sulfide toward Electrocatalytic Water Splitting, *ACS Appl Mater Interfaces*, 2019, **11**, 21634–21644.
- 4 K. C. Majhi and M. Yadav, Transition Metal-Based Chalcogenides as Electrocatalysts for Overall Water Splitting, *ACS Engineering Au*, 2023, **3**, 278–284.
- 5 J. S. Kumar, S. Bolar, N. C. Murmu, R. S. Ganesh, H. Inokawa, A. Banerjee and T. Kuila, Synthesis of Tri-functional Core-shell CuO@carbon Quantum Dots@carbon Hollow Nanospheres Heterostructure for Non-enzymatic H<sub>2</sub>O<sub>2</sub> Sensing and Overall Water Splitting Applications, *Electroanalysis*, 2019, **31**, 2120–2129.
- 6 R. Huang, W. Chen, Y. Zhang, Z. Huang, H. Dai, Y. Zhou, Y. Wu and X. Lv, Well-designed cobalt-nickel sulfide microspheres with unique peapod-like structure for overall water splitting, *J Colloid Interface Sci*, 2019, **556**, 401–410.
